# Supplementary material for: Evolution of Protein Ductility in Duplicated Genes of Plants
Source: PubMed Central journal article supplement (PMC6109787; doi:10.3389/fpls.2018.01216), 2018-08-20
Supplement: Table_1.pdf [file Table_1.pdf]

**TABLE S1.** Characteristics of the plant species examined with DisoPred v3.1

| Plant specie                   | Proteome size | Haploid chromosomes number ( <i>n</i> ) | Pair of co-linear paralogues | Fraction of total aligned IDRs DisoPred v3.1 | Fraction of aligned IDRs in segments L>30aa DisoPred v3.1 |
|--------------------------------|---------------|-----------------------------------------|------------------------------|----------------------------------------------|-----------------------------------------------------------|
| Monocots<br>( $2n=2x$ )        |               |                                         |                              |                                              |                                                           |
| <i>Zea mays</i>                | 58,615        | 10                                      | 7,031                        | 0.22                                         | 0.54                                                      |
| <i>Oryza sativa</i>            | 40,881        | 12                                      | 3,251                        | 0.26                                         | 0.50                                                      |
| <i>Brachypodium distachyon</i> | 33,844        | 5                                       | 2,335                        | 0.26                                         | 0.52                                                      |
|                                |               |                                         |                              |                                              |                                                           |
| Eudicots<br>( $2n=2x$ )        |               |                                         |                              |                                              |                                                           |
| <i>Populus trichocarpa</i>     | 73,110        | 19                                      | 13,988                       | 0.26                                         | 0.47                                                      |
| <i>Arabidopsis thaliana</i>    | 48,148        | 6                                       | 3,947                        | 0.25                                         | 0.50                                                      |
